# Supplementary material for: Nanomedicines Bearing an Alkylating Cytostatic Drug from the Group of 1,3,5-Triazine Derivatives: Development and Characterization
Source: MDPI journal article supplement (doi:10.3390/pharmaceutics14112506), 2022-11-18
Supplement: s1 [file s1]

## Supplementary Materials

# Nanomedicines Bearing an Alkylating Cytostatic Drug from the Group of 1,3,5-Triazine Derivatives: Development and Characterization

Ekaterina Sinitsyna <sup>1,2</sup>, Irina Bagaeva <sup>2</sup>, Erik Gandalipov <sup>3</sup>, Evgenia Fedotova <sup>2</sup>, Viktor Korzhikov-Vlakh <sup>1,2</sup>, Tatiana Tennikova <sup>2</sup>, Evgenia Korzhikova-Vlakh <sup>1</sup>

<sup>1</sup> Institute of Macromolecular Compounds, Russian Academy of Sciences, Bolshoy pr. 31, St. Petersburg 199004, Russia;

<sup>2</sup> Institute of Chemistry, Saint-Petersburg State University, Universitetsky pr. 26, St. Petersburg 198504, Russia;

<sup>3</sup> International Institute of Solution Chemistry and Advanced Materials Technologies, ITMO University, Lomonosov street 9, St. Petersburg 191002, Russia;

\* Correspondence: [vlakh@hq.macro.ru](mailto:vlakh@hq.macro.ru) (E.K.-V.)

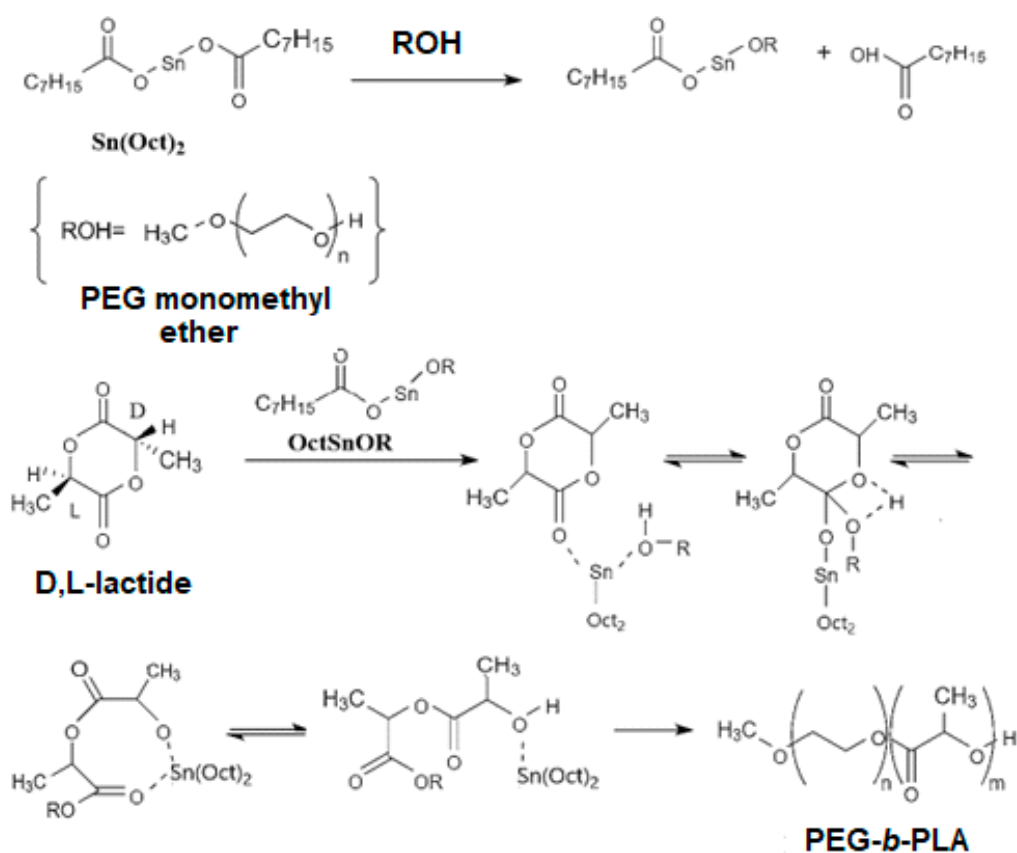

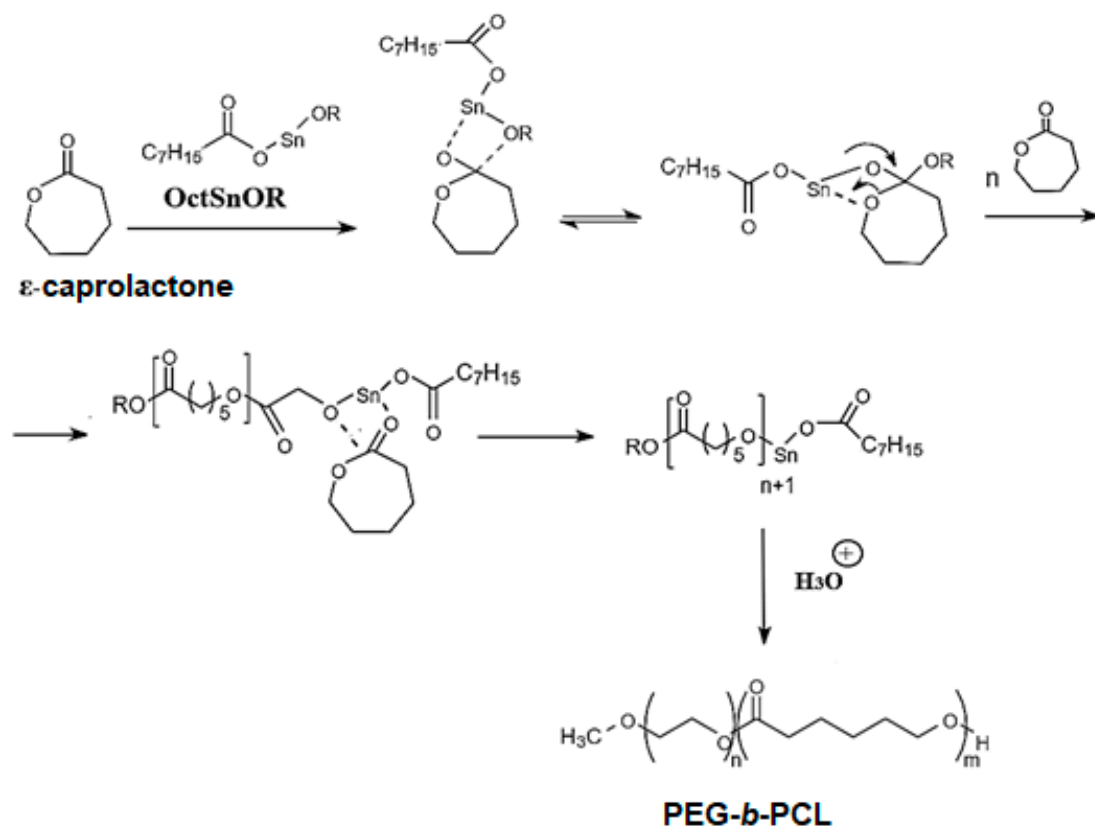

(b)

**Figure S1.** Synthesis of PEG-*b*-PLA (a) and PEG-*b*-PCL (b) *via* ring opening polymerization (ROP) of corresponding monomers.

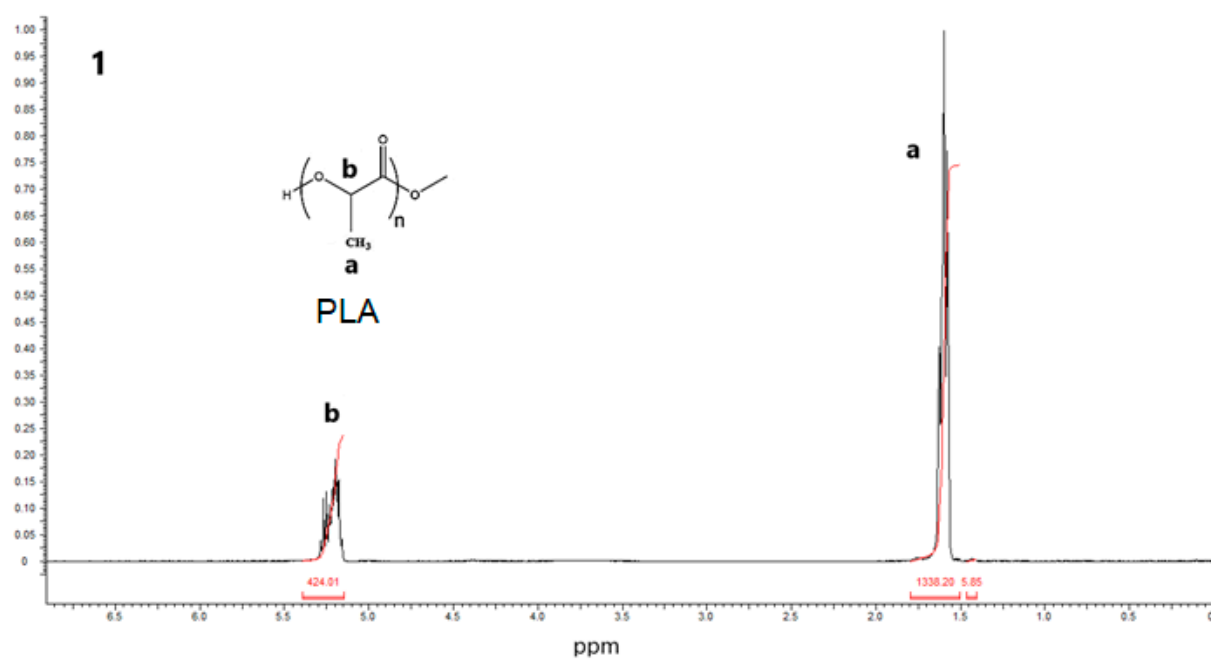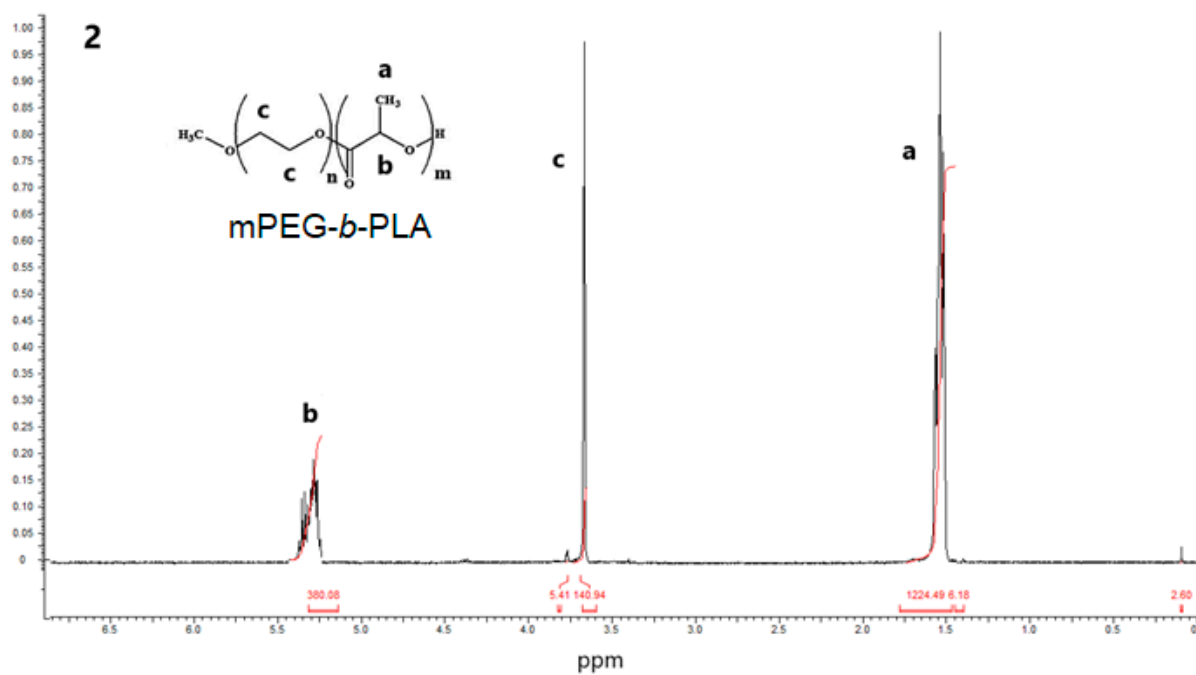

Figure S2.  $^1\text{H}$  NMR spectra for PLA (1) and PEG-*b*-PLA (2).

(a)

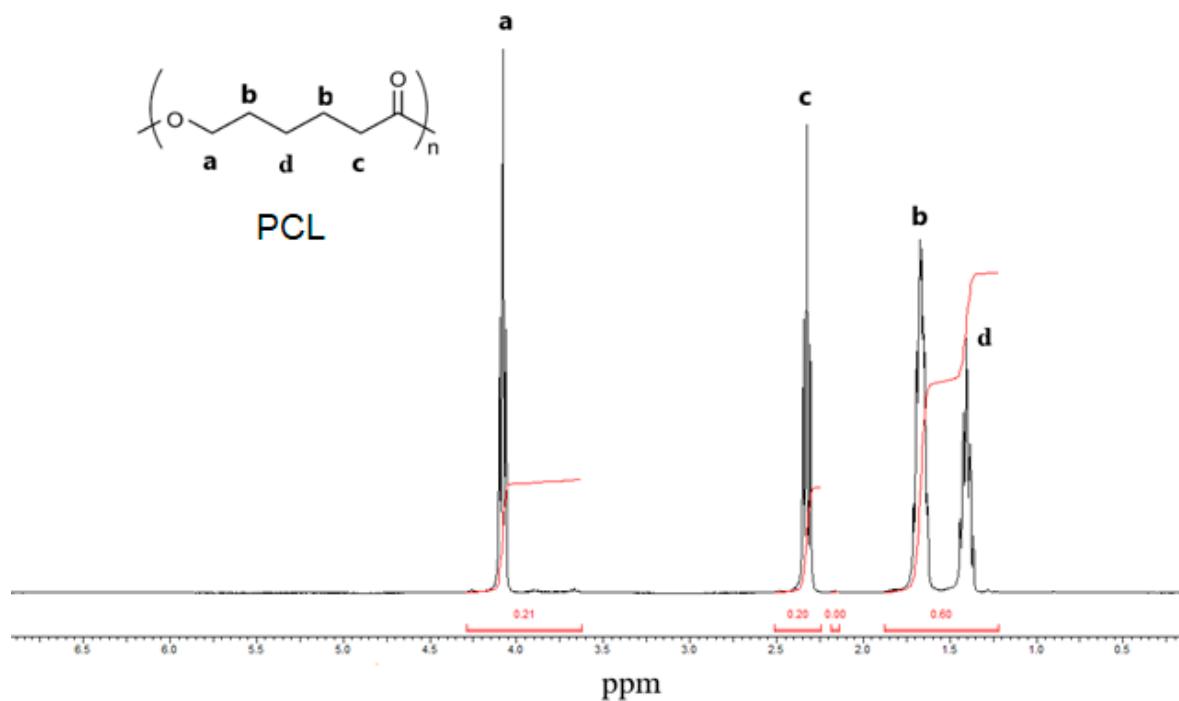

(b)

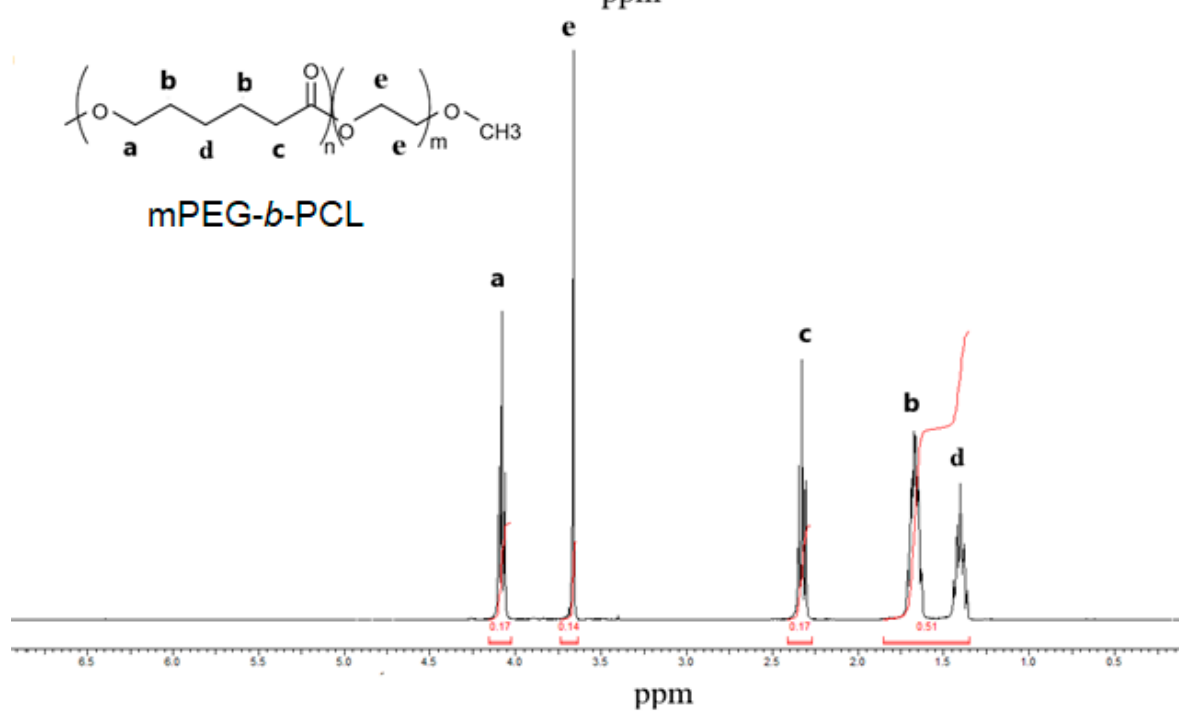

Figure S3. <sup>1</sup>H NMR spectra for PCL (a) and PEG-*b*-PCL (b).

Using the three-component polymer/solvent/water phase diagram shown in **Figure S4**, the optimal composition of the initial components falling in the metastable region was as follows (all in wt%): polymer/acetonitrile/water = 0.08/16.7/83.2.

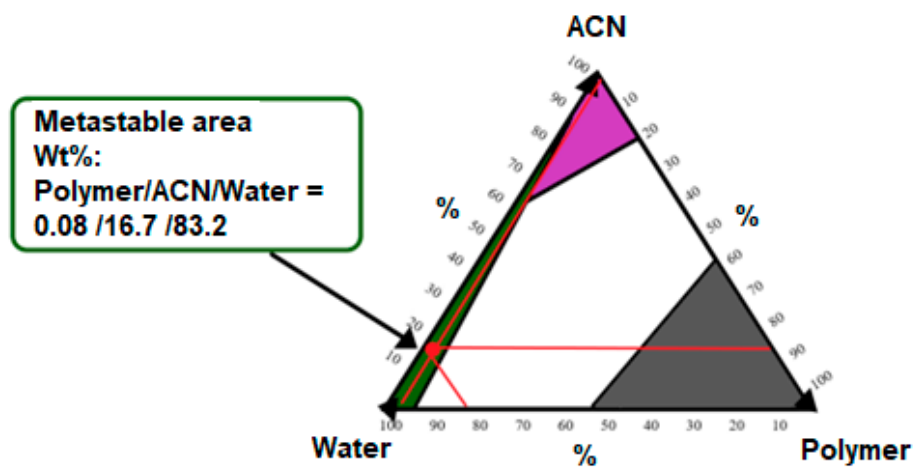

**Figure S4.** Three-component phase diagram polymer/organic solvent/water with selected optimal wt% of components to prepare nanoparticles up to 100 nm in diameter.

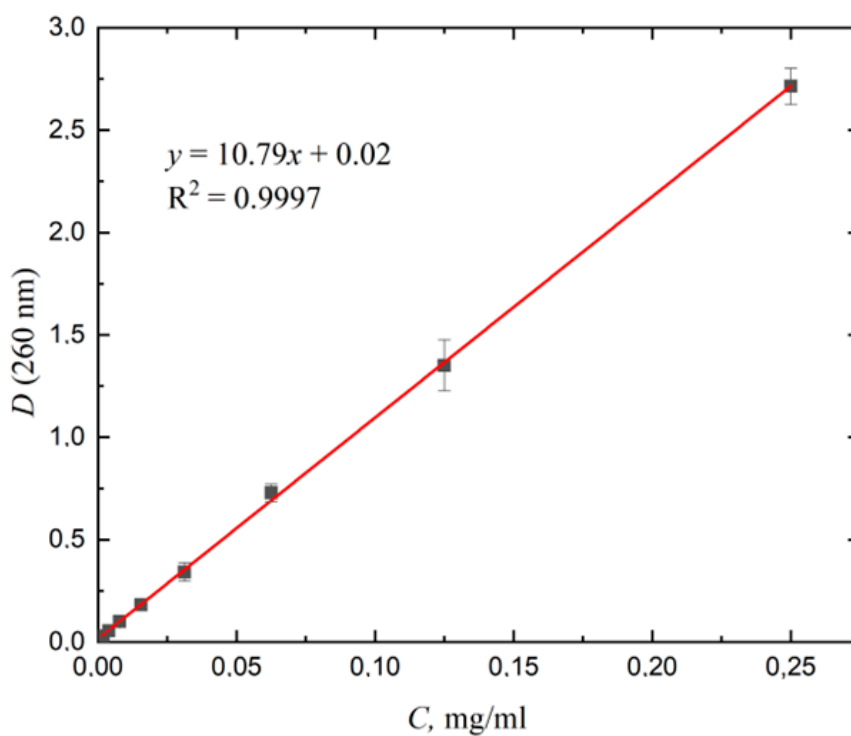

**Figure S5.** Calibration plot of absorbance on the different concentration of dioxadet solutions (in dichloromethane).

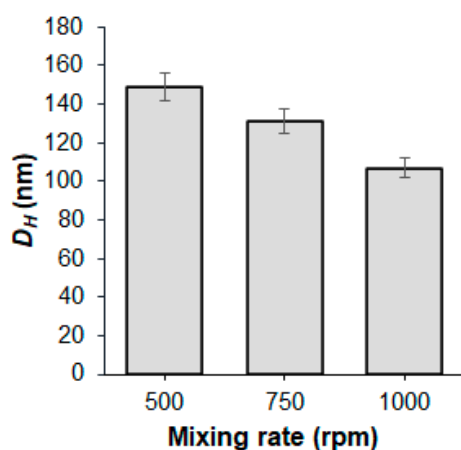

**Figure S6.** Dependence of the hydrodynamic diameter of mPEG-*b*-PLA nanoparticles on the mixing rate of the organic (ACN/THF) and aqueous (deionized water) phases.

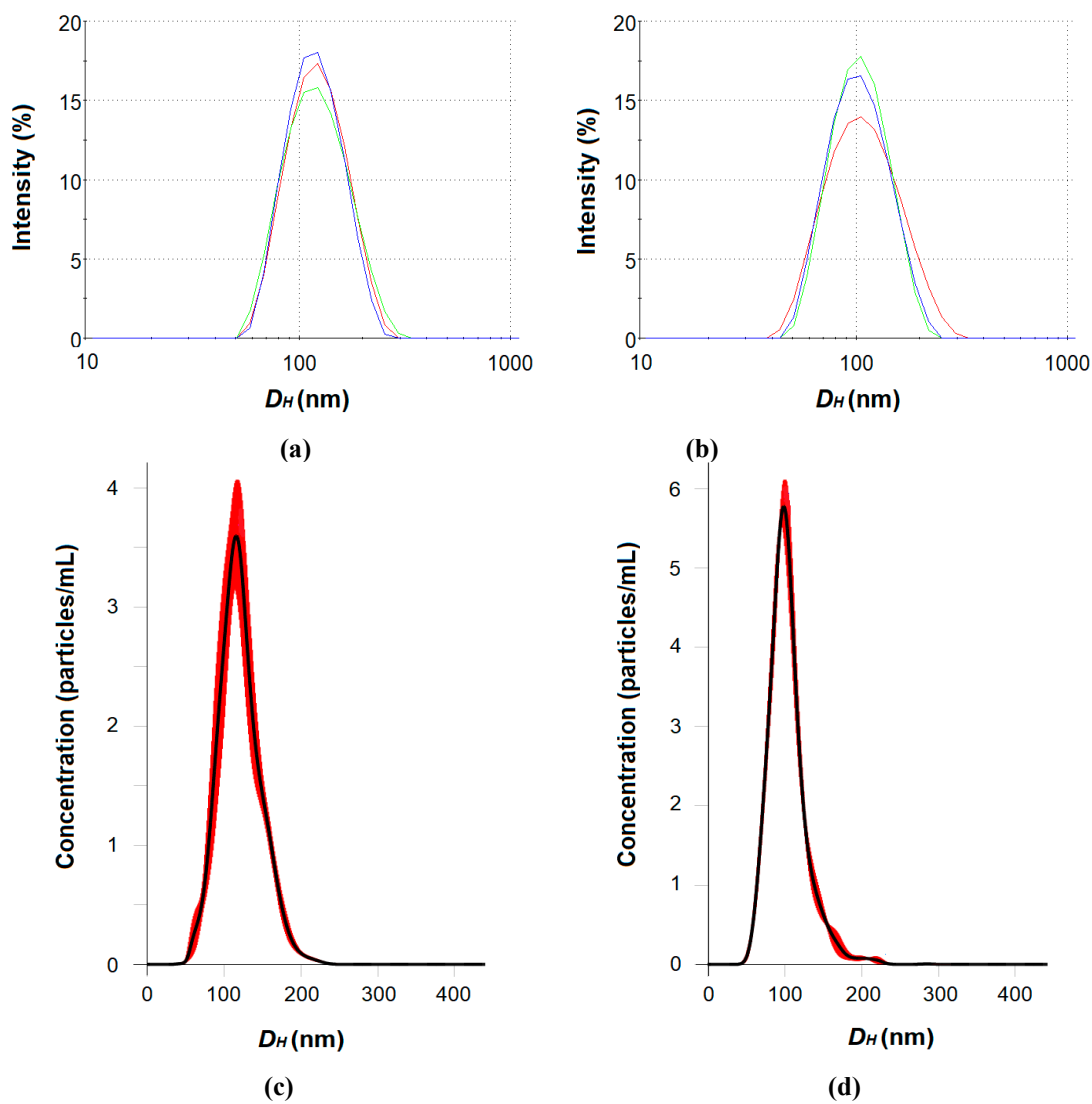

**Figure S7.** Distribution of the mPEG-*b*-PLA (a,c) and mPEG-*b*-PCL (b,d) nanoparticles by hydrodynamic diameter analyzed by DLS (a, b), and NTA (c, d).

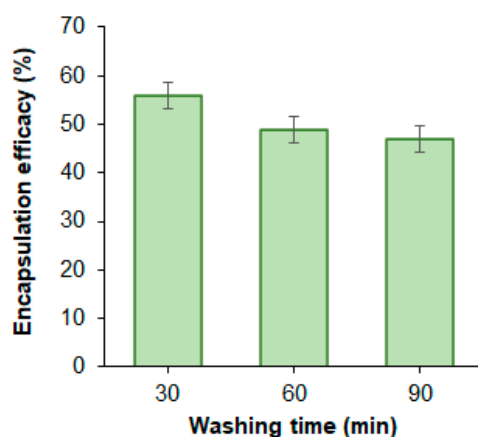

**Figure S8.** Dependence of the purification time of the prepared nanoformulations on encapsulation efficacy.

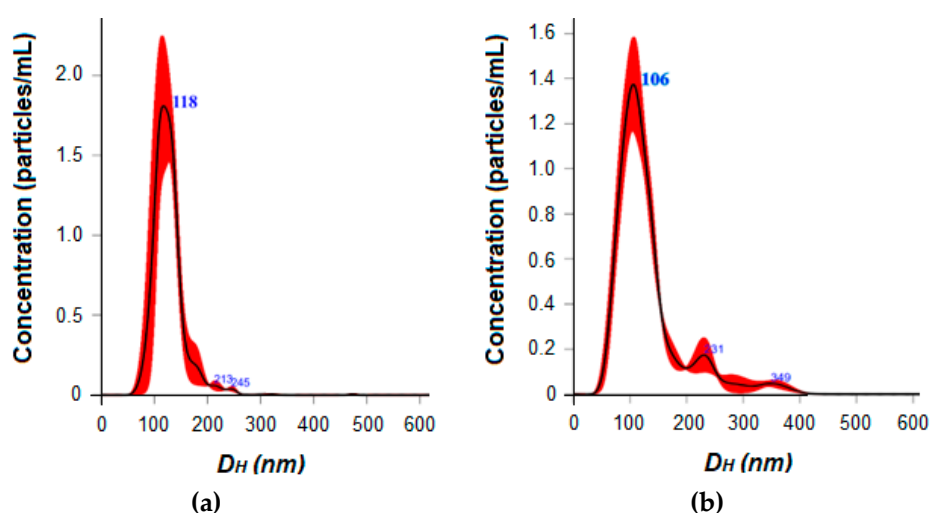

**Figure S9.** Distribution in hydrodynamic diameter of the nanomedicines (NTA; samples prepared at the initial DOD amount equal to 50  $\mu\text{g}/\text{mg}$  polymer: **(a)** DOD/mPEG-*b*-PLA; **(b)** DOD/mPEG-*b*-PCL; the red line represents the average of three measurements).

(a)

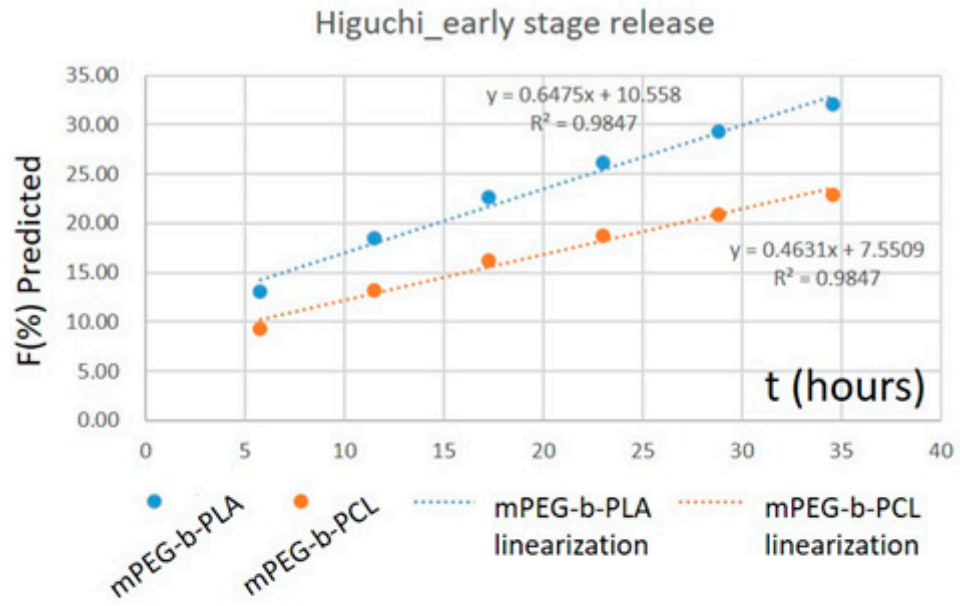

(b)

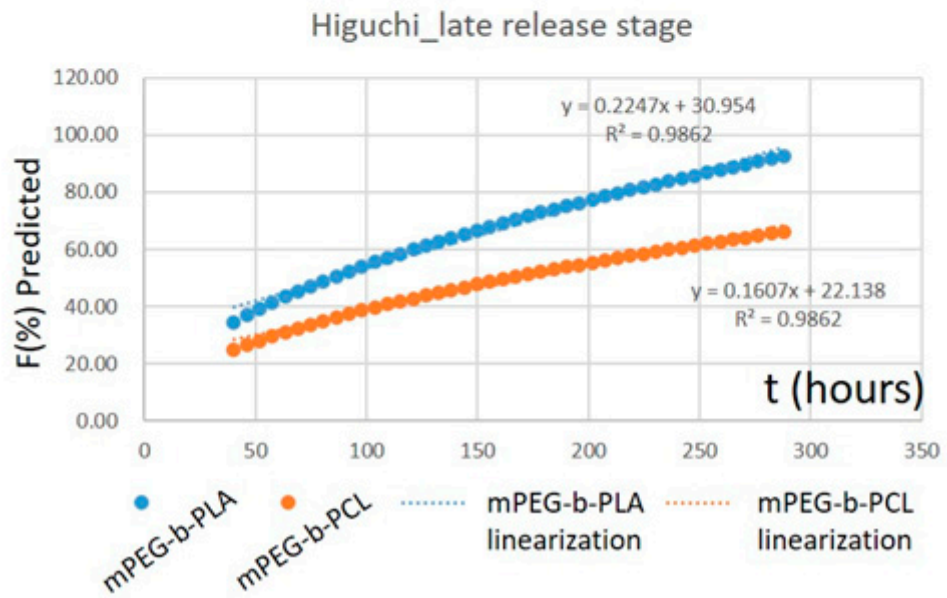

**Figure S10.** Linearization of early and late DOD release from mPEG-*b*-PLA (a) and mPEG-*b*-PCL (b) as predicted with Higuchi model. Quite clear linearizations show two stages with two different diffusion coefficients.



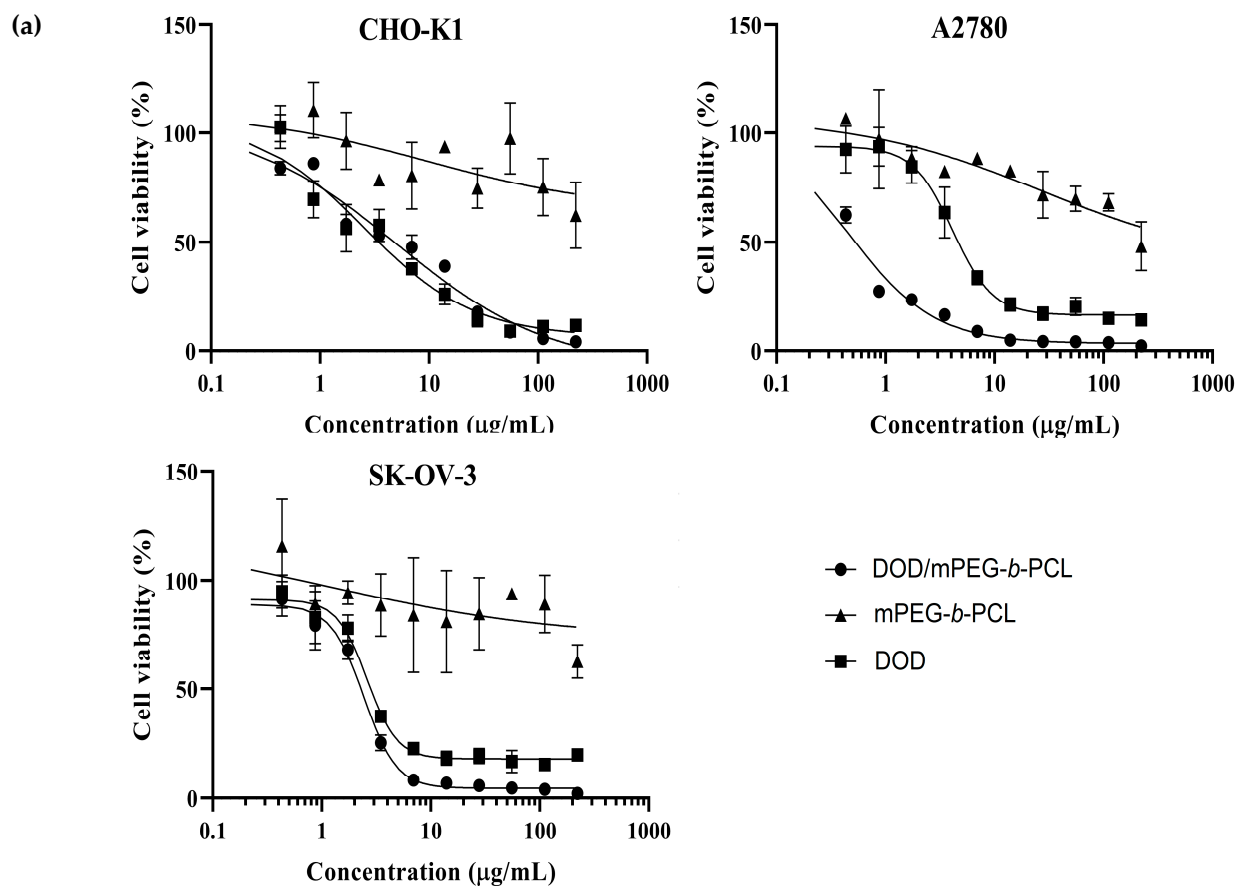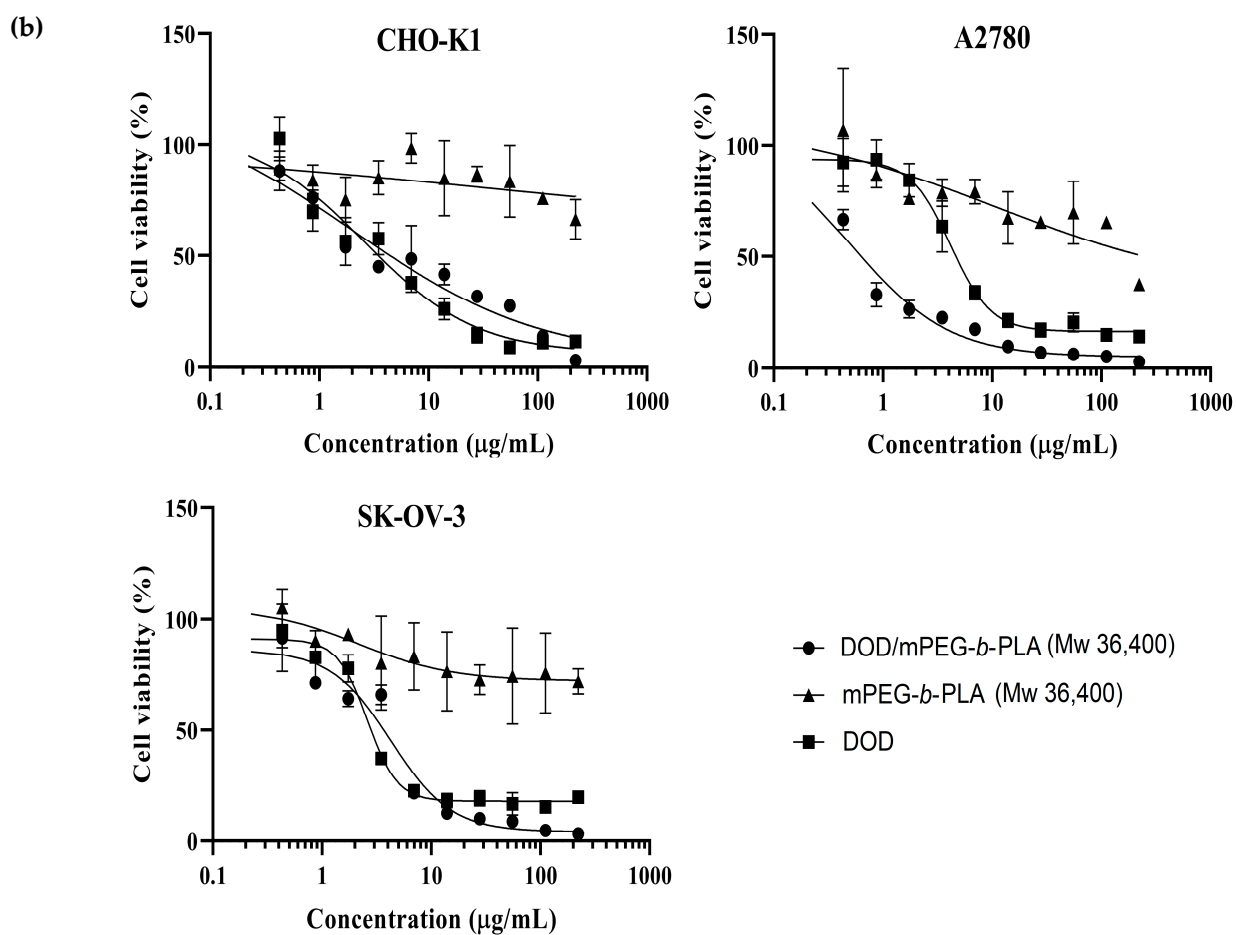

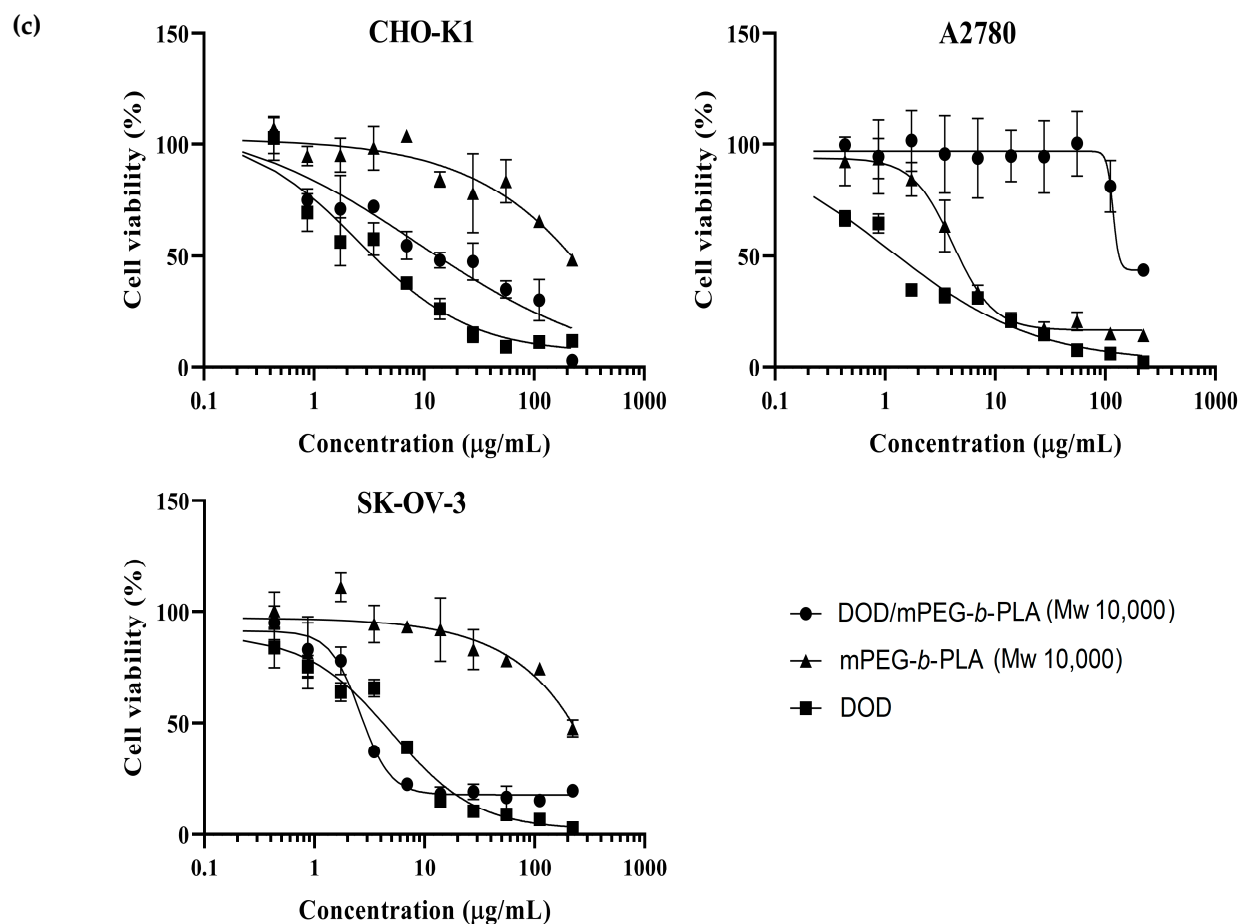

**Figure S11.** Dependence of cell viability on the concentration of nanomedicines, empty polymer nanoparticles and free dioxadet for different cell lines: **(a)** a series for mPEG-*b*-PCL; **(b)** a series for mPEG-*b*-PLA ( $M_w$  36,400) and **(c)** a series for mPEG-*b*-PLA ( $M_w$  10,000).

**Table S1.** Dependence of the yield of nanoparticles based on mPEG-*b*-PLA (sample #7, Table 1) and mPEG-*b*-PCL (sample #11, Table 1) (nanoprecipitation from organic phase to water).

| Initial drug amount<br>( $\mu\text{g/mg}$ of polymer) | Yield (%) |
|-------------------------------------------------------|-----------|
| <b>mPEG-<i>b</i>-PLA</b>                              |           |
| 50                                                    | 74        |
| 100                                                   | 72        |
| 200                                                   | 75        |
| 300                                                   | 75        |
| 400                                                   | 72        |
| 500                                                   | 70        |
| <b>mPEG-<i>b</i>-PCL</b>                              |           |
| 50                                                    | 44        |
| 100                                                   | 46        |
| 200                                                   | 46        |
| 300                                                   | 45        |
| 400                                                   | 46        |
| 500                                                   | 43        |
